## **Comment on “Rapid and efficient *in vivo* astrocyte-to-neuron conversion with regional identity and connectivity?”**

Gong Chen\*, Wen Li\*, Zongqin Xiang, Liang Xu, Minhui Liu, Qingsong Wang, Wenliang Lei\*

Guangdong-Hong Kong-Macau Institute of CNS Regeneration, Jinan University  
Guangzhou 510632, China

### **Keywords:**

In vivo reprogramming; glia-to-neuron conversion; AAV; retrovirus; dosage; astrocyte; neuron; lineage tracing

\*Correspondence should be addressed to:

Dr. Gong Chen

GHM Institute of CNS Regeneration

Jinan University

Email: [gongchen@jnu.edu.cn](mailto:gongchen@jnu.edu.cn)

Or

Dr. Wen Li

[liwenhb@163.com](mailto:liwenhb@163.com)

Or Dr. Wenliang Lei

[leiwenliang@jnu.edu.cn](mailto:leiwenliang@jnu.edu.cn)

## ABSTRACT

Regenerating functional new neurons in the adult mammalian central nervous system (CNS) has been proven to be very challenging due to the inability of neurons to divide and repopulate themselves after neuronal loss. In contrast, glial cells in the CNS can divide and repopulate themselves under injury or disease conditions. Therefore, many groups around the world have been able to utilize internal glial cells to directly convert them into neurons for neural repair. We have previously demonstrated that ectopic expression of NeuroD1 in dividing glial cells can directly convert reactive glial cells into neurons. However, Wang et al. recently posted an article in bioRxiv challenging the entire field of *in vivo* glia-to-neuron conversion after using one single highly toxic dose of AAV ( $2 \times 10^{13}$  gc/ml, 1  $\mu$ l) in the mouse cortex, producing artifacts that are very difficult to interpret. We present data here that reducing AAV dosage to safe level will avoid artifacts caused by toxic dosage. We also demonstrate with Aldh1l1-CreER<sup>T2</sup> and Ai14 reporter mice that lineage-traced astrocytes can be successfully converted into NeuN<sup>+</sup> neurons after infected by AAV5 GFAP::NeuroD1. Retroviral expression of NeuroD1 further confirms our previous findings that dividing glial cells can be converted into neurons. Together, the incidence of Wang et al. sends an alarming signal to the entire *in vivo* reprogramming field that the dosage of viral vectors is a critical factor to consider when designing proper experiments. For AAV, we recommend a relatively safe dose of  $1 \times 10^{10}$  -  $1 \times 10^{12}$  gc/ml ( $\sim 1$   $\mu$ l) in the rodent brain for cell conversion experiments addressing basic science questions. For therapeutic purpose under injury or diseased conditions, AAV dosage needs to be adjusted through a series of dose finding experiments. Moreover, we recommend that the AAV results are further verified with retroviruses that mainly express transgenes in dividing glial cells in order to draw solid conclusions.

## INTRODUCTION

The idea of directly converting one type of cells into other cell types for tissue regeneration has fascinated biologists for decades (1). However, it was not until the pioneering research on master regulator genes that started to provide important insights on lineage reprogramming. For instance, transcription factor MyoD can convert dermal fibroblasts, chondroblasts and retinal pigmented epithelial cells into contracting muscle cells (2-4). Similarly, transcription factor C/EBP reprograms B lymphocytes into macrophages (5), while transcription factor Math1 transforms non-sensory cells into hair cells in the ear (6, 7). Besides that, neural transcription factor NeuroD converts most of the embryonic ectoderm cells into neurons in *Xenopus* (8). The cell transdifferentiation field entered into a new era led by the success of Shinya Yamanaka and his colleagues showing successful reprogramming of fibroblast cells into induced pluripotent stem cells (iPSCs) (9-11). In particular, using combinations of transcription factors and small molecules, many labs around the globe have been able to directly convert different types of cells into neurons both *in vitro* and *in vivo*. For example, Vierbuchen et al. converted skin fibroblast cells into neurons using transcription factors Ascl1, Brn2, and Myt1l (12). Shortly after that, many somatic cells such as fibroblasts, hepatocytes, pericytes, astrocytes, and peripheral T cells in cell culture have also been successfully trans-differentiated into various subtypes of induced neurons including but not limited to glutamatergic, GABAergic, dopaminergic, motor neurons, and retinal neurons *in vitro* (13-30). As for *in vivo* reprogramming, our group has previously reported that a single neural transcription factor NeuroD1 can convert reactive glial cells into fully functional neurons in mouse brains with injury or Alzheimer's disease (31). More recently, we demonstrated that NeuroD1 AAV-based gene therapy can regenerate and protect a large number of functional neurons to restore brain functions after ischemic injury in adult mice (32). We also reported that AAV-mediated expression of NeuroD1 and Dlx2 can reprogram striatal astrocytes into GABAergic medium spiny neurons and hence improve the motor functions and extend the life span in Huntington's disease mouse models (33). In another attempt to reprogram glial cells into neurons, Zhang and colleagues converted astrocytes into neuroblasts with transcription factor Sox2 and then further differentiated them into neurons in mouse brain and spinal cord (34-38). Many other groups have also successfully transdifferentiated glial cells into neurons *in vivo* through ectopic expression of Ascl1 (39) or combinations of transcription factors such as Ascl1+Lmx1a+Nurr1 (40, 41), or Ascl1+Sox2 (42), or Neurogenin-2+Bcl-2 (43), or Neurogenin-2 plus growth factors FGF2 and EGF (44). A mixture of NeuroD1, Ascl1, Lmx1a, and microRNA 218 transformed mouse astrocytes into dopaminergic neurons

(45). In addition, overexpression of *Ascl1* in mouse retina also converted Müller glia into inner retinal neurons in both young and adult mice with NMDA damage (46, 47), and application of *Otx2*, *Crx* and *Nrl* after  $\beta$ -catenin expression could reprogram Müller glia into rod photoreceptors which restored lost vision in adult mice (48). Different from overexpression of transcription factors, Qian et al. reported recently that depleting the RNA-binding protein *Ptbp1* in the substantia nigra can convert midbrain astrocytes into dopaminergic neurons and restore motor functions in Parkinson's disease mouse model (49). Surprisingly, Zhou et al. reported that striatal astrocytes can also be converted into dopaminergic neurons by CRISPR-mediated *Ptbp1* knockdown (50), which has been disputed by Qian et al. (49). Taken together, direct glia-to-neuron conversion has been successfully achieved both *in vitro* and *in vivo*, using a variety of neural transcription factors or knocking down RNA-binding protein *Ptbp1* by many labs around the world. Therefore, it is a completely surprise that Wang et al. (51) would challenge the entire field of *in vivo* glia-to-neuron conversion simply based on a set of experiments using very high dose of AAV at  $2 \times 10^{13}$  gc/ml (1  $\mu$ l) in the mouse cortex. This article will attempt to clarify the confusion about the leakage versus conversion caused by highly toxic level of AAV used by Wang et al. (51). We also present evidence that lineage traced-astrocytes can be converted into neurons by *NeuroD1* in *Aldh1l1-CreER<sup>T2</sup>* mice crossed with *Ai14* mice, and that using retrovirus to express transgenes in dividing glial cells is another safeguard to unambiguously demonstrate *in vivo* glia-to-neuron conversion.

## RESULTS

### **AAV GFAP::Cre should express Cre in astrocytes not in neurons**

It is perhaps not too difficult to understand that injecting too much viruses into the brain will cause toxic effects. However, it appears that not everyone knows the importance of viral dosing, or even worse, not checking whether there are any toxic effects after viral injection into the brain. A perfect example is the recent bioRxiv paper posted by Wang et al (51), where  $2 \times 10^{13}$  gc/ml x 1  $\mu$ l AAV particles were injected into the mouse cortex, producing artifacts that led the authors to challenge the entire field of *in vivo* reprogramming.

AAV has been approved by FDA for various clinical trials due to its relatively low immunogenicity, and some gene therapy products based on AAV have been marketed for therapeutic use. In the gene therapy field, it is well-known that AAV dosing is critical when considering how much AAV should be administered into the body. For the brain, it is even more important to use minimal effective dosing of AAV to avoid any brain damage. Previously, it has been reported that high dosing AAV can produce harmful

effects on both neurons and glial cells in mammalian brains (52-57). In particular, Ortinski et al (52) has reported that high titre AAV will cause astrocytic gliosis and impair synaptic transmission. Xiong et al (58) has also reported AAV toxicity in the retina when using much lower dose than that used by Wang et al (51). Unfortunately, Wang et al (51) appeared to be unaware of these very important works in the field and conducted all their experiments based on a single toxic dosing of AAV ( $2 \times 10^{13}$  gc/ml x  $1 \mu\text{l}$ ) in the mouse cortex. Wang et al reported that when they injected AAV GFAP::Cre into the mouse brain, which should express Cre in GFAP<sup>+</sup> astrocytes, they instead observed Cre expression predominantly in neurons (Wang et al., Fig. 3, 14 days post viral injection) (51). Typically, when one sees such abnormal result, one would immediately lower the AAV dosing and repeat the experiments until find the right dosing so that GFAP::Cre is properly expressed in GFAP<sup>+</sup> astrocytes. However, it is surprising that the authors continued their experiments with such high level of AAV which is toxic to the CNS as reported before (52-57). With such high dosing of AAV, it is not surprising that Cre, and likely other transgenes as well such as NeuroD1, would be found in neurons, making any data interpretation invalid.

Such artifacts caused by high dosing of AAV reported by Wang et al (51) can be easily avoided using lower dosage of AAV. In fact, we have performed many GFAP::Cre experiments and never observed such high expression of Cre transgene in neurons, because we usually use much lower dosing AAV to express Cre ( $1 \times 10^{10}$  -  $1 \times 10^{11}$  gc/ml x  $1 \mu\text{l}$ ). Fig. 1 illustrates a typical example of Cre expression in astrocytes (top row, GFAP/S100b<sup>+</sup>), but not in neurons (bottom row, NeuN<sup>+</sup>). Therefore, it is critical to design experiments properly with the right dosage of AAV to start any experiments. Too high dosage of AAV will damage brain cells and produce artifacts that is difficult to interpret.

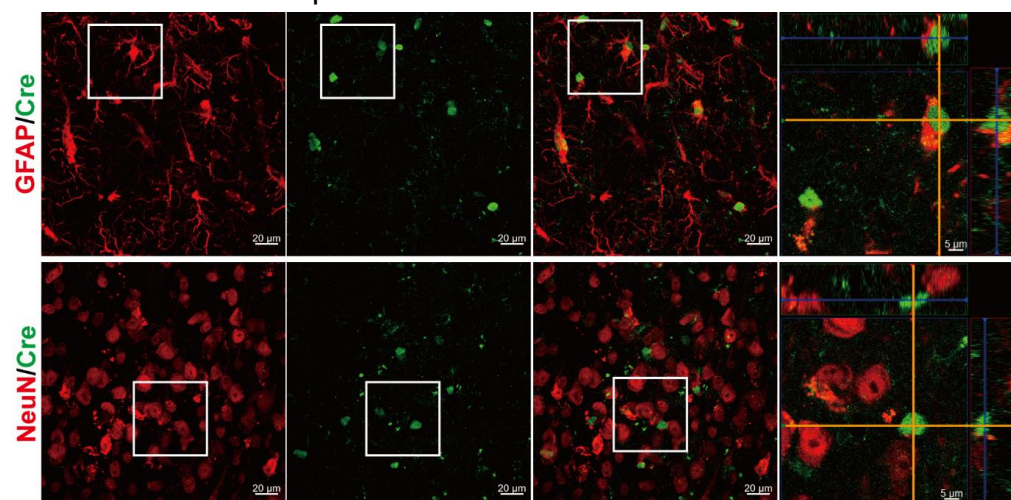

**Figure 1. AAV9 GFAP::Cre expression in GFAP<sup>+</sup>-astrocytes but not in NeuN<sup>+</sup>-neurons in the mouse cortex.**

AAV dosing at  $1 \times 10^{10}$  gc/ml,  $1 \mu\text{l}$ ; 14 days post viral injection (dpi).

### **Astrocyte-to-Neuron conversion in Aldh1l1-CreER<sup>T2</sup> mice**

Wang et al (51) reported that when Aldh1l1-CreER<sup>T2</sup> mice were crossed with R26R-YFP mice to label some of the astrocytes with YFP after administration of tamoxifen, the YFP-labeled astrocytes were difficult to convert into neurons. Our group has performed similar lineage tracing experiments but observed clear astrocyte-to-neuron conversion (Fig. 2-3). We crossed Aldh1l1-CreER<sup>T2</sup> mice with Ai14 mice and administered tamoxifen to induce Cre-mediated recombination so that some of the astrocytes will be labeled by tdTomato (Fig. 2). As expected, the tdTomato-labeled cells were immunopositive for astrocyte marker GFAP/S100 $\beta$  in non-viral infected cortex (contralateral to the viral injected hemisphere) (Fig. 2A left panel, and Fig. 2B). In contrast, in AAV5 GFAP::NeuroD1-infected cortex, some of the tdTomato-labeled cells lost GFAP/S100 $\beta$  signal, and displayed typical neuronal morphology (Fig. 2A right panel, and Fig. 2C). Further immunostaining with neuronal marker NeuN confirmed the neuronal identity of some of the tdTomato-labeled cells in NeuroD1-infected cortex (Fig. 3). Therefore, these astrocytic lineage tracing experiments in Aldh1l1-CreER<sup>T2</sup> mice clearly demonstrate that astrocytes can be directly converted into neurons by NeuroD1, consistent with our series of publications in recent years (31-33, 59-62).

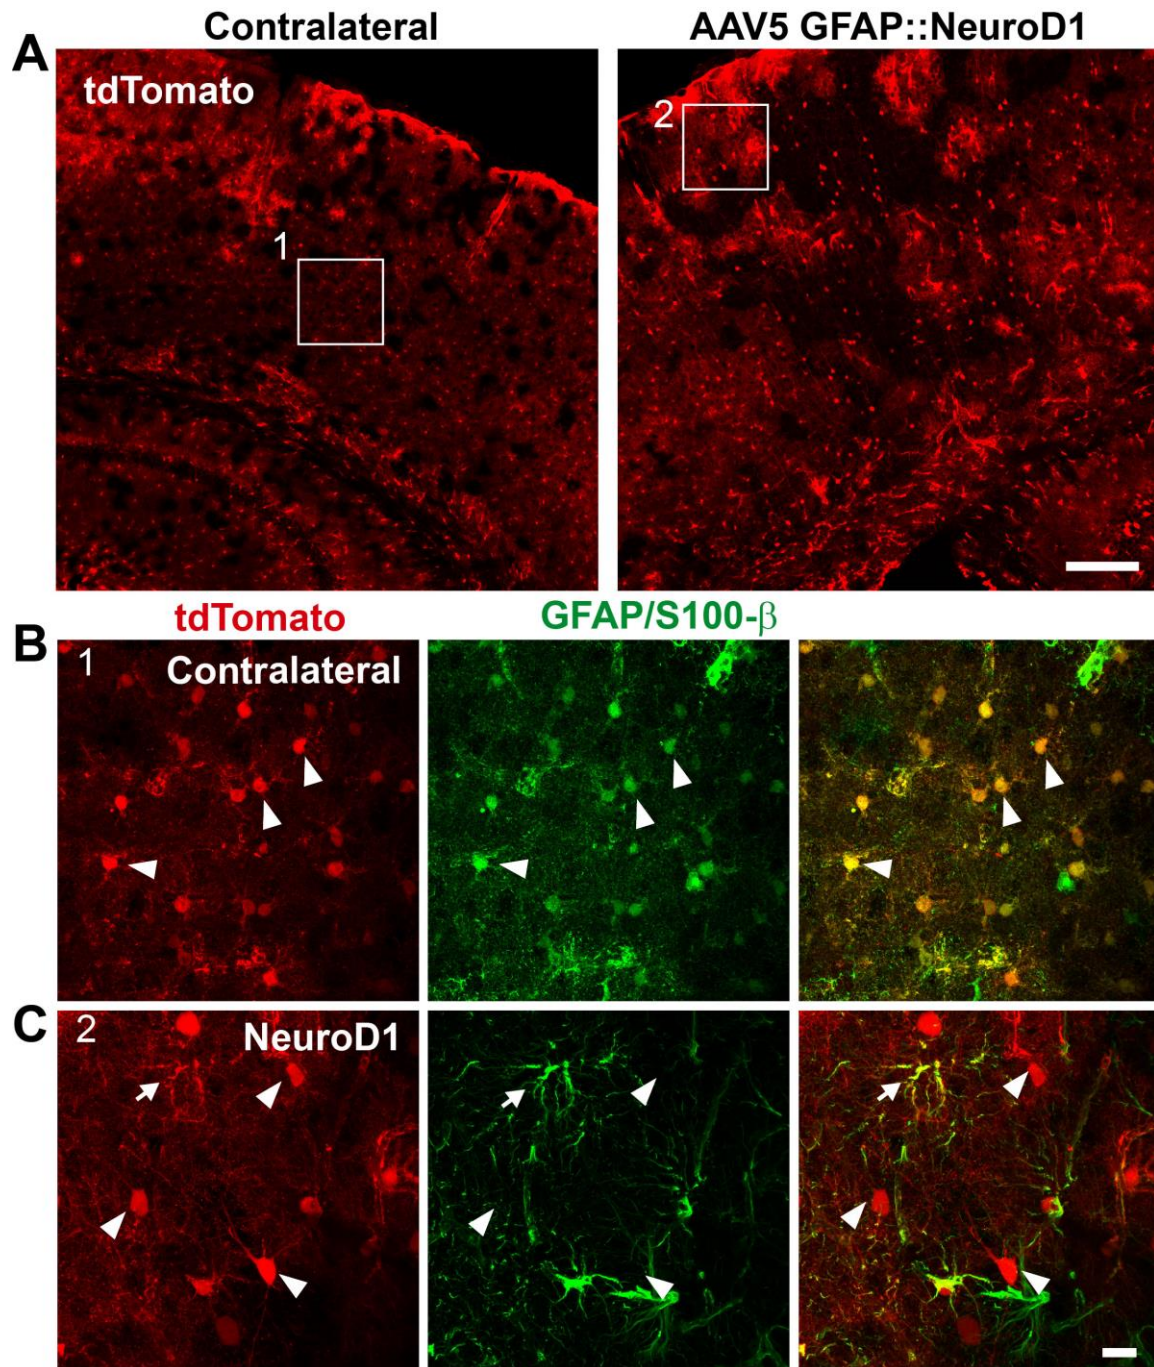

**Fig. 2. Lineage traced astrocytes in *Aldh1l1-CreER<sup>T2</sup>* mice crossed with *Ai14* mice.**

A, tdTomato-labeled cells in AAV5 NeuroD1-infected cortex (right panel) and non-infected contralateral cortex (left panel).

B, In contralateral side without viral injection (Box1 in panel A), tdTomato-labeled cells were GFAP/S100 $\beta$ -positive astrocytes, as expected.

C, In NeuroD1-infected cortex (Box2 in panel A), some tdTomato-labeled cells showed clear neuronal morphology and not co-localized with GFAP/S100 $\beta$ .

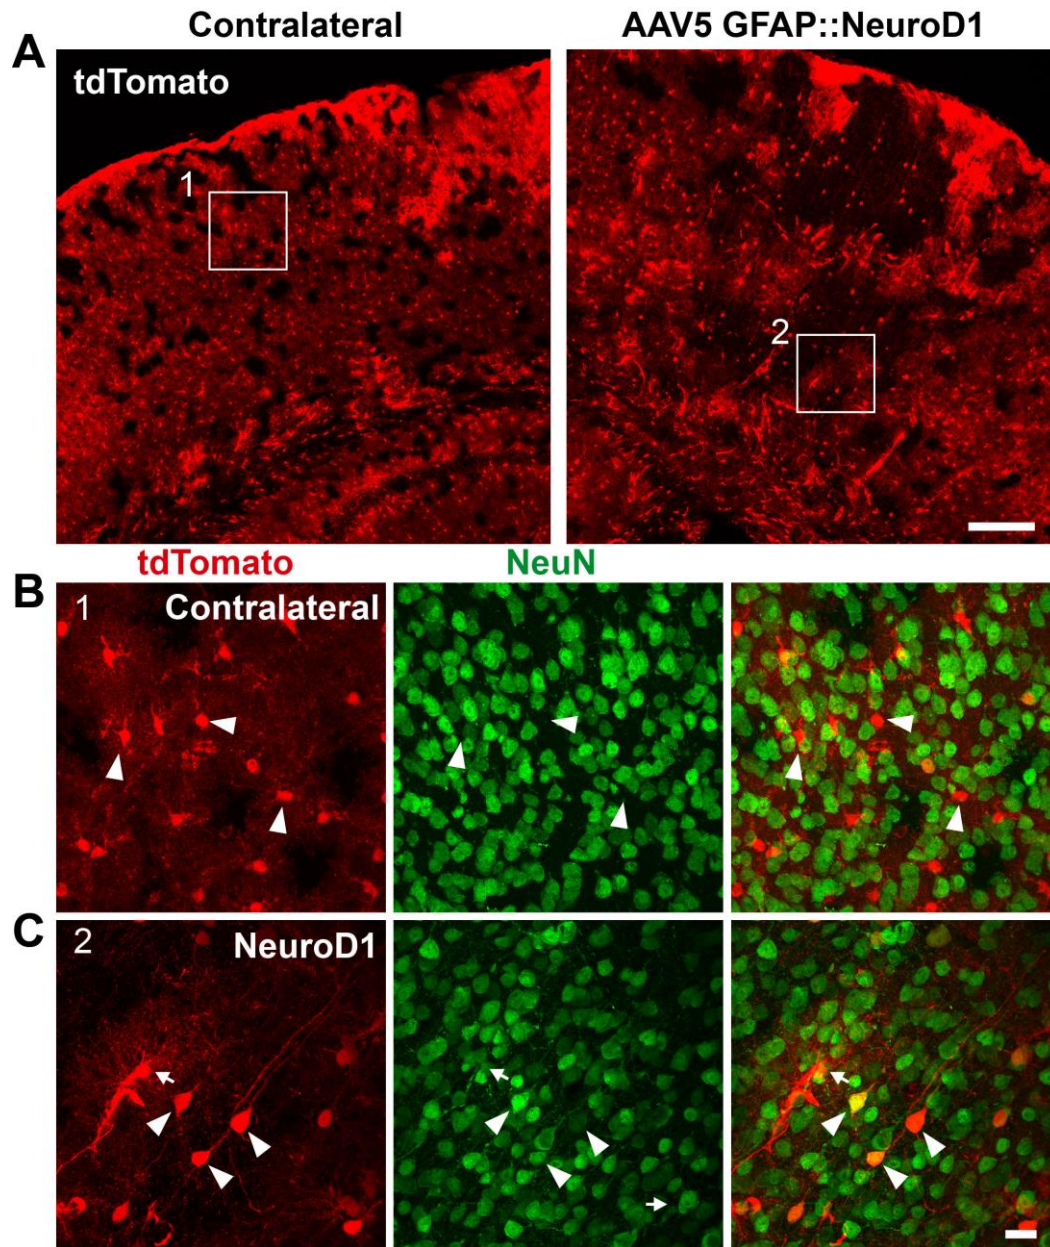

**Fig. 3. tdTomato-labeled astrocytes in Aldh1l1-CreER<sup>T2</sup> mice converted into NeuN<sup>+</sup> neurons after infected by AAV5 GFAP::NeuroD1.**

A, tdTomato-labeled cells in non-infected contralateral cortex (left panel) and NeuroD1-infected cortex (right panel).

B, In non-infected contralateral side (Box1 in panel A), tdTomato-labeled cells were rarely colocalizing with NeuN.

C, In NeuroD1-infected cortex (Box2 in panel A), some tdTomato-labeled cells were co-localized with NeuN, indicating that they have been converted into neurons. Note that the number of tdTomato-labeled astrocytes decreased significantly in the NeuroD1-converted areas, further suggesting that these tdTomato-labeled neurons were originally converted from tdTomato-traced astrocytes.



## Neuronal conversion induced by retrovirus overexpressing NeuroD1 in dividing glial cells

While AAV has the advantage of low immunogenicity and relatively safe as a gene therapy vector for the treatment of neurological disorders, its capability to infect both neurons and glial cells may cause confusion if AAV dosing and promoter are not handled properly. Therefore, if one's main research purpose is not to generate as many neurons as possible to treat certain neurological disorders, retroviruses that mainly target dividing glial cells may be a better choice to study basic molecular mechanisms of glia-to-neuron conversion. We have previously reported that retroviruses expressing NeuroD1 can convert dividing glial cells into neurons (31, 32). Here, we provide another example of using retrovirus, instead of AAV, to ectopically express NeuroD1 in dividing glial cells and convert glial cells into neurons (Fig. 4). When injecting retroviruses into adult mouse cortex, because neurons cannot divide and therefore retroviruses cannot enter neuronal nuclei, only dividing glial cells can allow retroviruses enter glial nuclei to express transgene. Therefore, retroviruses should always be readily deployed if any confusion arises regarding AAV results. To conclude, if someone still has any doubt on whether certain transcription factor(s) can convert glial cells into neurons or not, then using retrovirus to express the transgene(s) should be a safe way to unambiguously test glia-to-neuron conversion without the complication of AAV.

### Retrovirus CAG::ND1-GFP

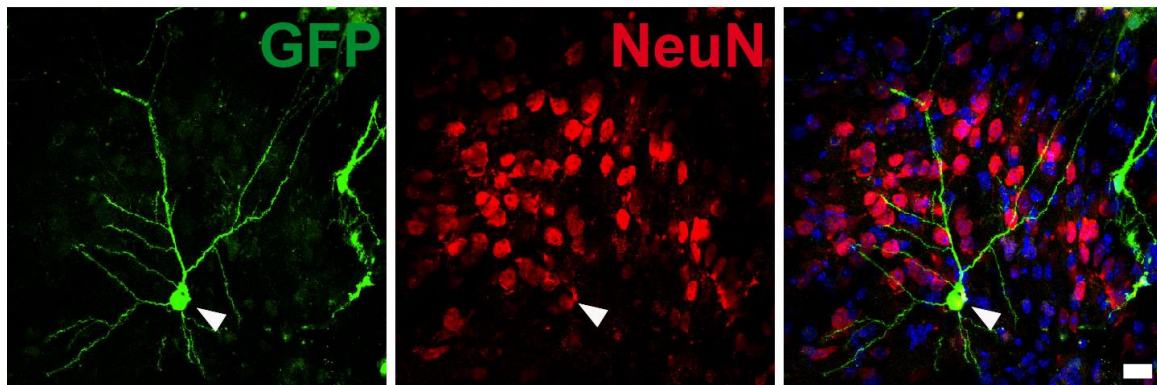

**Fig. 4. Retrovirus as an important tool to target dividing glial cells more specifically than AAV.**

Ectopic expression of NeuroD1 through retroviruses (CAG::NeuroD1-GFP,  $1 \times 10^7$  gc/ml, 1  $\mu$ l) in the dividing glial cells of the mouse cortex converted glial cells into neurons (14 dpi). For more retrovirus info, see Guo et al (31).

## DISCUSSION

In recent years, many groups have used AAV-mediated ectopic expression of transcription factors or knockdown of PTBP1 to convert resident glial cells into neurons. However, Wang et al. (51) used a rather high dosage of AAV (10-1000 folds higher than that used in our lab or other labs) to challenge the field of *in vivo* reprogramming. In this responding article, we point out that the high dosage of AAV used by Wang et al (51) is destined to produce artifacts, as shown by their GFAP::Cre expression in neurons instead of astrocytes. We also provide further evidence to demonstrate unambiguously that glial cells can be converted into neurons by ectopic expression of NeuroD1 through lineage tracing or retroviral expression experiments.

Given such artifacts arising from a prominent lab, we feel that it is important to lay out some principles regarding how to make a right judgement on genuine *in vivo* glia-to-neuron conversion:

**First**, one must take a wholistic view on the entire *in vivo* glia-to-neuron conversion field before focusing on one single experiment, which can be an artifact produced by a specific person.

**Second**, one must test different doses of the delivery vehicles (viral or non-viral) to find optimal dosing for certain experiments. In particular, the toxic effects of high dosing should be tested because it is obvious that our brain cannot tolerate a huge amount of viral infection (or non-viral particles).

**Third**, for any factor(s) that is claimed to be capable of converting glial cells into neurons, we recommend conducting both *in vitro* and *in vivo* studies and use both retrovirus and AAV (or lentivirus) to unambiguously demonstrate the glia-to-neuron conversion. Note that, AAV is great for *in vivo* work but infects cultured astrocytes with relatively low efficiency. Retroviruses are better for *in vitro* cultured astrocytes.

**Last but not least**, for anyone who has benefit of doubt on *in vivo* glia-to-neuron conversion, please keep your mind open. Make comments specific on the data, and don't simply criticize new discoveries using "I can't believe" as a non-scientific argument. After all, scientific new discoveries are pushing the boundaries of our understanding every day.

### **Virus dosing is critical to avoid artifacts**

Injecting high dosage of AAV into the brain may result in some artifacts that are very difficult to interpret. Wang et al (51) injected 1  $\mu$ l of  $2 \times 10^{13}$  GC/ml AAV5 GFAP::Cre into the mouse cortex and found that the Cre signal was predominantly detected in neurons instead of astrocytes. It is certainly difficult to understand why their Cre

expression was found in neurons under the control of astrocytic promoter GFAP. In their discussion part, they attributed this phenomenon to exosomes or tunneling nanotubes induced by some uncertain genetic manipulations (51). While this is one possibility, a more straightforward explanation is the toxic effects to neurons caused by high dosage of virus administration. In our previous studies, we proved that  $1-2 \times 10^{10-11}$  of AAV GFAP::Cre (only 1/100 to 1/1000 of their dosage) was sufficient to trigger Cre-mediated recombination in the mouse cortex and striatum (32, 33). Most importantly, as repeated here in this study, Cre expression was restricted to astrocytes at this low dose. It is incomprehensible why Wang et al (51) applied 1000-fold higher dosage of GFAP::Cre without questioning their own data of Cre expression in neurons. They should have investigated immediately why Cre was mostly expressed in neurons, and by lowering AAV dosage they could have found the right answer quickly without falsely challenging the field of *in vivo* reprogramming based on one set of improperly designed experiments.

### **NeuroD1-induced astrocyte-to-neuron conversion through lineage tracing**

Wang et al (51) reported their lineage tracing experiments by crossing tamoxifen-inducible *Aldh1l1-CreER<sup>T2</sup>* transgenic mice with a reporter line (*R26R-YFP* or *Ai14*) to trace astrocytes labeled by YFP. We have conducted almost the same experiments using *Aldh1l1-CreER<sup>T2</sup>* mice crossed with a different reporter line *Ai14*. Surprisingly, while we report here clear astrocyte-to-neuron conversion through astrocyte lineage-tracing experiments, Wang et al (51) reached opposite conclusion of not detecting NeuN<sup>+</sup> neurons. Comparison of the two studies identified immediately the time difference of the results reported after NeuroD1 AAV injection: we found clear conversion of tdTomato-traced astrocytes into neurons at 135 days post AAV NeuroD1 injection (experiment delayed by COVID-19); while Wang et al (51) stopped short of their experiments at 28 days post AAV NeuroD1 injection. We have already informed the senior author of Wang et al (51) (C-L Zhang) about our lineage tracing results, and they promised to observe longer time in their lineage tracing experiments. We look forward to hearing from them soon and seeing their updated version of the article, hopefully together with their lowered dosage of GFAP::Cre results. In fact, even in the present data of Wang et al (51), the morphology of the NeuroD1-infected YFP-traced astrocytes was obviously different from that of the control group. In their NeuroD1 group (see Wang et al, Fig. 5F and Fig. 6F), the NeuroD1-infected YFP-traced astrocytes displayed clear morphological changes toward neuronal like structures with many fine processes already retracted in comparison to the control group. It is rather astonishing that the authors of Wang et al (51) would ignore such evident morphological changes and abruptly ended their experiments at 28 days post

NeuroD1 AAV infection. We sincerely hope that Wang et al will soon provide longer time point data to tell the world whether those morphologically changed YFP-traced astrocytes will become NeuN<sup>+</sup> neurons or not.

### **How to interpret the BrdU data in a right way?**

Quiescent or resting astrocytes are more resistant to cell conversion compared to reactive astrocytes, which explains why previous studies targeted more on reactive astrocytes for *in vivo* reprogramming (31-33, 36, 43, 44, 49, 50, 63-65). However, Wang et al (51) used BrdU-incorporation experiment to declare that converted neurons were not derived from BrdU<sup>+</sup> reactive astrocytes, largely due to their poorly designed experiments for BrdU-labeling. The major flaw of their BrdU experiment is that they have administered BrdU for such a long-time span of weeks after AAV NeuroD1 injection, leading to a large number of BrdU<sup>+</sup> astrocytes that have never had a chance to be infected by AAV NeuroD1. Therefore, they of course could not detect many BrdU<sup>+</sup> neurons and the ratio of BrdU<sup>+</sup>NeuN<sup>+</sup> neurons was artificially low among all the BrdU<sup>+</sup> cells. The right experiment should be to inject AAV NeuroD1 at the end of their BrdU labeling in order to convert many BrdU-labeled astrocytes into neurons. BrdU labeling should be stopped immediately after AAV injection to prevent further BrdU-labeling.

### **How to understand the puzzle of neuronal density not changed after conversion?**

Wang et al (51) was puzzled by the fact that after astrocyte-to-neuron conversion, there was no significant increase of neuronal density. We have essentially observed the same phenomenon in non-injured non-diseased mouse brains. However, in injured brains with substantial neuronal loss, we always detect a significant increase of neuronal density across the entire injury/diseased areas. In fact, from the data presented by Wang et al (51), the tissue repair is so obvious in their Fig. 2 (C, E) and their Fig. 6F, as shown by significantly reduced cortical tissue loss in the NeuroD1 group compared to their control group, which is also consistent with our reported findings (61). Wang et al (51) ignored the apparent tissue repair in the center of lesion core in the NeuroD1 group, and asked why neuronal density did not increase significantly in the less injured surrounding areas. This is actually similar to our findings in the mouse striatum of Huntington's disease model where the neuronal density did not change much after conversion but the overall striatal atrophy was alleviated (33). Wang et al (51) assumed that the neuronal density should increase after conversion, but they probably did not realize that their highly toxic AAV dosage already damaged many neurons, eventually leading to a balance between the newly converted neurons and the loss of preexisting neurons. We hypothesize that there should be some kind of homeostatic control to keep the neuron density in certain brain regions relatively

constant to maintain normal functions, which surely warrants further studies.

Besides neuronal density, there is also some concern in the field that astrocyte-to-neuron conversion might lead to the depletion of astrocytes in the converted areas. Fortunately, we have never observed any depletion of astrocytes in NeuroD1-converted areas in mouse, rat, and monkey brains. In fact, the results from Wang et al (51) confirmed our observations that astrocytes were not depleted in NeuroD1-expressed areas, consistent with the notion that astrocytes are dividing cells with proliferative capability (66, 67). Our recent study detected more proliferative astrocytes (Ki67+) in the converted areas, indicating that astrocytes can repopulate themselves after some of the astrocytes being converted into neurons (33)(61).

### **Recommendation for future research**

Given the fact that C-L Zhang's lab was among the early pioneers who reported *in vivo* glia-to-neuron conversion, the impact of the pre-print article of Wang et al (51) would pose grave danger to the field of *in vivo* reprogramming if their flawed design and wrong interpretations were not corrected immediately. While it is up to every single scientist to make his or her own judgement, we do want to reiterate the importance of using different dose, different types of viral vectors, and perform both *in vitro* and *in vivo* experiments to prove or disprove any hypothesis. We do have every reason to believe that Wang et al (51) might have good intention to raise a potential problem to the field, but such hasty deposit of improperly designed experiments based solely on one single high dosing of AAV without verification by retrovirus and *in vitro* studies, should be highly discouraged in future studies.

## Materials and Methods

### Mouse

8-10-week-old mice were used in this experiment. The wildtype C56BL/6J mice were purchased from Guangdong Medical Laboratory Animal Center (Guangzhou, China), Aldh1l1-Cre<sup>ERT2</sup> transgenic mice (031008) and Ai14 knock in mice (#007914) were from Jackson Laboratory. All animals were housed in a 12 h light/dark cycle and supplied with sufficient food and water. All the experiments were approved by Jinan University laboratory animal ethics committee.

### Virus information

Single strand adenovirus-associated viral (ssAAV, AAV for short) vector hGFAP::Cre and FLEX-CAG::mCherry were constructed as previously described (32), and used for Cre experiment (Fig. 1). A short version of hGFAP promoter (681 bp) was also used in this study (68) for the lineage tracing experiment (Fig. 2-3). AAV serotype 9 (AAV9) and 5 (AAV5) were produced by PackGene<sup>®</sup> Biotech, LLC, purified through iodixanol gradient ultracentrifuge and subsequent concentration. Purified AAV viruses were tittered using a quantitative PCR-based method. All AAV used in this study was prepared in 0.001% Pluronic F-68 solution (Poloxamer 188 Solution, PFL01-100ML, Caisson Laboratories, Smithfield, UT, USA). Retroviral vector CAG::NeuroD1-IRES-GFP were constructed, packaged and concentrated as previously described (32) for the retrovirus experiment (Fig. 4).

### Mouse Model of Ischemic Injury and Virus Injection

Endothelin-1 (ET-1, 1-31) was injected into motor cortex of the adult WT C56BL/6J mice to create a focal ischemic injury as described (32), for the Cre experiment. Briefly, the mice were anesthetized with 20 mg/kg 1.25% Avertin (a mixture of 12.5 mg/mL of 2,2,2-Tribromoethanol and 25  $\mu$ L/mL 2-Methyl-2-butanol, Sigma, St. Louis, MO, USA) through intraperitoneal injection and then placed in a prone position in the stereotaxic frame. 1  $\mu$ L of ET-1 (1  $\mu$ g/ $\mu$ L dissolved in PBS) was injected at the following coordinate: +0.2 mm anterior-posterior (AP),  $\pm$  1.5 mm medial-lateral (ML), 1.2 mm dorsal-lateral (DV) at the speed of 100 nl/min. After injection, the pipette was kept in place for about 10 minutes and then slowly withdrawn. 7 days later, 1  $\mu$ L of virus mixture AAV9 hGFAP::Cre ( $1 \times 10^{10}$  GC/ml) and FLEX-CAG::mCherry ( $1 \times 10^{12}$  GC/ml) was injected at the same coordinates.

For intact mouse cortex, 1  $\mu$ L of retroviruses CAG::NeuroD1-IRES-GFP ( $1 \times 10^7$  TU/ml) or 1  $\mu$ L of AAV5 GFAP::NeuroD1 ( $1 \times 10^{12}$  GC/ml) were injected at the similar coordinates described above.

## Immunofluorescence

The mice were anesthetized with 2.5% Avertin and then sequentially perfused intracardially first with saline solution (0.9% NaCl) and then with 4% paraformaldehyde (PFA). The brains were collected and post-fixed in 4% PFA overnight and sequentially placed in 20% and 30% sucrose at 4°C until the tissue sank. The dehydrated brains were embedded in Optimal Cutting Temperature (Tissue-Tek® O.C.T. Compound, Sakura® Finetek, Torrance, CA, USA), and then serially sectioned at the coronal plane on the cryostat (Thermo Scientific, Shanghai, China) at 30 µm thickness. For immunofluorescence, free floating brain sections were first washed with PBS and blocked for 1 hour at room temperature (RT) in 5% normal donkey serum, 3% bovine serum albumin and 0.3% TritonX-100 prepared in PBS, and then incubated overnight at 4 °C with primary antibodies diluted in blocking solution. After additional washing with 0.2% PBST (0.2% tween-20 in PBS), the samples were incubated with 4',6-diamidino-2-phenylindole (DAPI; F. Hoffmann-La Roche, Nutley, NJ, USA) and appropriate donkey anti-mouse/rabbit/rat/chicken secondary antibodies conjugated to Alexa Fluor 488, Alexa Fluor 555, or Alexa Fluor 647 (1:1000, Life technologies, Carlsbad, CA, USA) for 2 hours at RT, followed by extensive washing with PBS. Samples were finally mounted with VECTASHIELD® mounting medium (VECTOR Laboratories, Burlingame, CA, USA) and sealed with nail polish. Representative Images were taken with confocal microscope (LSM880, Zeiss, Jena, Germany).

Primary antibodies used were listed as follows: rabbit anti-GFAP (a marker for astrocytes, 1:1000, Cat# Z0334, DAKO), rabbit anti-NeuN (a marker for neurons 1:1000, Cat# ab177487, Abcam, Cambridge, Massachusetts, USA), rabbit anti-S100β (a marker for astrocytes, 1:500, Cat# ab52642, Abcam), mouse anti-Cre recombinase (1:500, Cat# MAB3120, Millipore), chicken anti mCherry (1:1000, Cat# ab205402, Abcam).

## Reference

1. Zhou Q & Melton DA (2008) Extreme makeover: converting one cell into another. *Cell stem cell* 3(4):382-388.
2. Choi J, *et al.* (1990) MyoD converts primary dermal fibroblasts, chondroblasts, smooth muscle, and retinal pigmented epithelial cells into striated mononucleated myoblasts and multinucleated myotubes. *Proc Natl Acad Sci U S A* 87(20):7988-7992.
3. Murry CE, Kay MA, Bartosek T, Hauschka SD, & Schwartz SM (1996) Muscle differentiation during repair of myocardial necrosis in rats via gene transfer with MyoD. *J Clin Invest* 98(10):2209-2217.
4. Lattanzi L, *et al.* (1998) High efficiency myogenic conversion of human fibroblasts by adenoviral vector-mediated MyoD gene transfer. An alternative strategy for ex vivo gene therapy of primary myopathies. *J Clin Invest* 101(10):2119-2128.
5. Xie H, Ye M, Feng R, & Graf T (2004) Stepwise reprogramming of B cells into macrophages. *Cell* 117(5):663-676.
6. Zheng JL & Gao WQ (2000) Overexpression of Math1 induces robust production of extra hair cells in postnatal rat inner ears. *Nat Neurosci* 3(6):580-586.
7. Izumikawa M, *et al.* (2005) Auditory hair cell replacement and hearing improvement by Atoh1 gene therapy in deaf mammals. *Nat Med* 11(3):271-276.
8. Lee JE, *et al.* (1995) Conversion of *Xenopus* ectoderm into neurons by NeuroD, a basic helix-loop-helix protein. *Science* 268(5212):836-844.
9. Takahashi K & Yamanaka S (2006) Induction of pluripotent stem cells from mouse embryonic and adult fibroblast cultures by defined factors. *Cell* 126(4):663-676.
10. Okita K, Ichisaka T, & Yamanaka S (2007) Generation of germline-competent induced pluripotent stem cells. *Nature* 448(7151):313-317.
11. Takahashi K, *et al.* (2007) Induction of pluripotent stem cells from adult human fibroblasts by defined factors. *Cell* 131(5):861-872.
12. Vierbuchen T, *et al.* (2010) Direct conversion of fibroblasts to functional neurons by defined factors. *Nature* 463(7284):1035-1041.
13. Addis RC, *et al.* (2011) Efficient conversion of astrocytes to functional midbrain dopaminergic neurons using a single polycistronic vector. *PLoS one* 6(12):e28719.
14. Caiazzo M, *et al.* (2011) Direct generation of functional dopaminergic neurons from mouse and human fibroblasts. *Nature* 476(7359):224-227.



15. Marro S, *et al.* (2011) Direct lineage conversion of terminally differentiated hepatocytes to functional neurons. *Cell Stem Cell* 9(4):374-382.
16. Pfisterer U, *et al.* (2011) Direct conversion of human fibroblasts to dopaminergic neurons. *Proc Natl Acad Sci U S A*.
17. Encinas Juan M, *et al.* (2011) Division-Coupled Astrocytic Differentiation and Age-Related Depletion of Neural Stem Cells in the Adult Hippocampus. *Cell stem cell* 8(5):566-579.
18. Yoo AS, *et al.* (2011) MicroRNA-mediated conversion of human fibroblasts to neurons. *Nature* advance online publication.
19. Giorgetti A, *et al.* (2012) Cord blood-derived neuronal cells by ectopic expression of Sox2 and c-Myc. *Proc Natl Acad Sci U S A* 109(31):12556-12561.
20. Karow M, *et al.* (2012) Reprogramming of pericyte-derived cells of the adult human brain into induced neuronal cells. *Cell Stem Cell* 11(4):471-476.
21. Ladewig J, *et al.* (2012) Small molecules enable highly efficient neuronal conversion of human fibroblasts. *Nat Methods* 9(6):575-578.
22. Liu ML, *et al.* (2013) Small molecules enable neurogenin 2 to efficiently convert human fibroblasts into cholinergic neurons. *Nature communications* 4:2183.
23. Xue Y, *et al.* (2013) Direct Conversion of Fibroblasts to Neurons by Reprogramming PTB-Regulated MicroRNA Circuits. *Cell* 152(1-2):82-96.
24. Li X, *et al.* (2015) Small-Molecule-Driven Direct Reprogramming of Mouse Fibroblasts into Functional Neurons. *Cell stem cell* 17(2):195-203.
25. Zhang L, *et al.* (2015) Small Molecules Efficiently Reprogram Human Astroglial Cells into Functional Neurons. *Cell Stem Cell* 17(6):735-747.
26. Tanabe K, *et al.* (2018) Transdifferentiation of human adult peripheral blood T cells into neurons. *Proc Natl Acad Sci U S A*.
27. Heinrich C, *et al.* (2010) Directing astroglia from the cerebral cortex into subtype specific functional neurons. *PLoS biology* 8(5):e1000373.
28. Victor MB, *et al.* (2014) Generation of human striatal neurons by microRNA-dependent direct conversion of fibroblasts. *Neuron* 84(2):311-323.
29. Colasante G, *et al.* (2015) Rapid Conversion of Fibroblasts into Functional Forebrain GABAergic Interneurons by Direct Genetic Reprogramming. *Cell stem cell* 17(6):719-734.
30. Berninger B, *et al.* (2007) Functional properties of neurons derived from in vitro reprogrammed postnatal astroglia. *J Neurosci* 27(32):8654-8664.
31. Guo Z, *et al.* (2014) In vivo direct reprogramming of reactive glial cells into functional neurons after brain injury and in an Alzheimer's disease model. *Cell Stem Cell* 14(2):188-202.
32. Chen YC, *et al.* (2020) A NeuroD1 AAV-Based Gene Therapy for Functional

- Brain Repair after Ischemic Injury through In Vivo Astrocyte-to-Neuron Conversion. *Mol Ther* 28(1):217-234.
33. Wu Z, *et al.* (2020) Gene therapy conversion of striatal astrocytes into GABAergic neurons in mouse models of Huntington's disease. *Nat Commun* 11(1):1105.
  34. Su Z, Niu W, Liu ML, Zou Y, & Zhang CL (2014) In vivo conversion of astrocytes to neurons in the injured adult spinal cord. *Nature communications* 5:3338.
  35. Niu W, *et al.* (2013) In vivo reprogramming of astrocytes to neuroblasts in the adult brain. *Nat Cell Biol* 15(10):1164-1175.
  36. Wang LL, *et al.* (2016) The p53 Pathway Controls SOX2-Mediated Reprogramming in the Adult Mouse Spinal Cord. *Cell Rep* 17(3):891-903.
  37. Niu W, *et al.* (2015) SOX2 reprograms resident astrocytes into neural progenitors in the adult brain. *Stem cell reports* 4(5):780-794.
  38. Islam MM, *et al.* (2015) Enhancer Analysis Unveils Genetic Interactions between TLX and SOX2 in Neural Stem Cells and In Vivo Reprogramming. *Stem Cell Reports* 5(5):805-815.
  39. Liu Y, *et al.* (2015) Ascl1 Converts Dorsal Midbrain Astrocytes into Functional Neurons In Vivo. *J Neurosci* 35(25):9336-9355.
  40. Torper O, *et al.* (2015) In Vivo Reprogramming of Striatal NG2 Glia into Functional Neurons that Integrate into Local Host Circuitry. *Cell Rep* 12(3):474-481.
  41. Pereira M, *et al.* (2017) Direct Reprogramming of Resident NG2 Glia into Neurons with Properties of Fast-Spiking Parvalbumin-Containing Interneurons. *Stem cell reports* 9(3):742-751.
  42. Heinrich C, *et al.* (2014) Sox2-mediated conversion of NG2 glia into induced neurons in the injured adult cerebral cortex. *Stem Cell Reports* 3(6):1000-1014.
  43. Gascon S, *et al.* (2016) Identification and Successful Negotiation of a Metabolic Checkpoint in Direct Neuronal Reprogramming. *Cell stem cell* 18(3):396-409.
  44. Grande A, *et al.* (2013) Environmental impact on direct neuronal reprogramming in vivo in the adult brain. *Nature communications* 4:2373.
  45. Rivetti di Val Cervo P, *et al.* (2017) Induction of functional dopamine neurons from human astrocytes in vitro and mouse astrocytes in a Parkinson's disease model. *Nature biotechnology* 35(5):444-452.
  46. Ueki Y, *et al.* (2015) Transgenic expression of the proneural transcription factor Ascl1 in Muller glia stimulates retinal regeneration in young mice. *Proc Natl Acad Sci U S A* 112(44):13717-13722.
  47. Jorstad NL, *et al.* (2017) Stimulation of functional neuronal regeneration from Muller glia in adult mice. *Nature* 548(7665):103-107.

48. Yao K, *et al.* (2018) Restoration of vision after de novo genesis of rod photoreceptors in mammalian retinas. *Nature*.
49. Qian H, *et al.* (2020) Reversing a model of Parkinson's disease with in situ converted nigral neurons. *Nature* 582(7813):550-556.
50. Zhou H, *et al.* (2020) Glia-to-Neuron Conversion by CRISPR-CasRx Alleviates Symptoms of Neurological Disease in Mice. *Cell* 181(3):590-603 e516.
51. Wang L-L, Garcia CS, Zhong X, Ma S, & Zhang C-L (2020) Rapid and efficient *in vivo* astrocyte-to-neuron conversion with regional identity and connectivity? *bioRxiv*:2020.2008.2016.253195.
52. Ortinski PI, *et al.* (2010) Selective induction of astrocytic gliosis generates deficits in neuronal inhibition. *Nature Neuroscience* 13(5):584-591.
53. Rogers GL, *et al.* (2011) Innate Immune Responses to AAV Vectors. *Frontiers in microbiology* 2:194.
54. Mingozi F & High KA (2011) Immune responses to AAV in clinical trials. *Current gene therapy* 11(4):321-330.
55. Lavin TK, Jin L, Lea NE, & Wickersham IR (2019) Monosynaptic tracing success depends critically on helper virus concentrations. *bioRxiv*:736017.
56. Hinderer C, *et al.* (2014) Widespread gene transfer in the central nervous system of cynomolgus macaques following delivery of AAV9 into the cisterna magna. *Molecular therapy. Methods & clinical development* 1:14051.
57. Xiong W, *et al.* (2019) AAV cis-regulatory sequences are correlated with ocular toxicity. *Proc Natl Acad Sci U S A* 116(12):5785-5794.
58. Xiong W, *et al.* (2019) AAV *cis*-regulatory sequences are correlated with ocular toxicity. *Proceedings of the National Academy of Sciences* 116(12):5785-5794.
59. Liu MH, *et al.* (2020) Differential neuronal reprogramming induced by NeuroD1 from astrocytes in grey matter versus white matter. *Neural Regen Res* 15(2):342-351.
60. Puls B, *et al.* (2019) Regeneration of dorsal spinal cord neurons after injury via *in situ* NeuroD1-mediated astrocyte-to-neuron conversion. *bioRxiv*:818823.
61. Zhang L, *et al.* (2018) Reversing Glial Scar Back To Neural Tissue Through NeuroD1-Mediated Astrocyte-To-Neuron Conversion. *bioRxiv*:261438.
62. Ge L-J, *et al.* (2019) *In Vivo* Neuroregeneration to Treat Ischemic Stroke in Adult Non-Human Primate Brains through NeuroD1 AAV-based Gene Therapy. *bioRxiv*:816066.
63. Brulet R, *et al.* (2017) NEUROD1 Instructs Neuronal Conversion in Non-Reactive Astrocytes. *Stem cell reports* 8(6):1506-1515.

64. di Val Cervo PR, *et al.* (2017) Induction of functional dopamine neurons from human astrocytes in vitro and mouse astrocytes in a Parkinson's disease model. *Nature biotechnology*.
65. Ge L-J, *et al.* (2019) Neuroregeneration to Treat Ischemic Stroke in Adult Non-Human Primate Brains through NeuroD1 AAV-based Gene Therapy. *bioRxiv:816066*.
66. Burda JE & Sofroniew MV (2014) Reactive gliosis and the multicellular response to CNS damage and disease. *Neuron* 81(2):229-248.
67. Barnabe-Heider F, *et al.* (2010) Origin of new glial cells in intact and injured adult spinal cord. *Cell Stem Cell* 7(4):470-482.
68. Lee Y, Messing A, Su M, & Brenner M (2008) GFAP promoter elements required for region-specific and astrocyte-specific expression. *Glia* 56(5):481-493.
